# Supplementary material
Source: publisher figshare collection journal article supplement (https://acs.figshare.com/ndownloader/files/5740266)
Supplement: Supplementary file 1 [file 5740266]

data_BaTeWO
 
#----------------------------------------------------------------------------#
#                   CHEMICAL INFORMATION                                     #
#----------------------------------------------------------------------------#
 
_chemical_name_systematic
;
 ?
;
_chemical_formula_moiety                'Ba1 O9 Te1 W2'
_chemical_formula_structural            'BA1 O9 TE1 W2'
_chemical_formula_sum                   'Ba O9 Te W2'
_chemical_formula_weight                776.64
_chemical_compound_source               'synthesis as described'
 
#----------------------------------------------------------------------------#
#                   UNIT CELL INFORMATION                                    #
#----------------------------------------------------------------------------#
 
_symmetry_cell_setting                  monoclinic
_symmetry_space_group_name_H-M          'P 21'
_symmetry_space_group_name_Hall         'P 2yb'
_symmetry_Int_Tables_number             4
loop_
    _symmetry_equiv_pos_as_xyz
'x, y, z'
'-x, y+1/2, -z'
 
_cell_length_a                          5.490(2)
_cell_length_b                          7.446(3)
_cell_length_c                          8.887(3)
_cell_angle_alpha                       90
_cell_angle_beta                        90.370(6)
_cell_angle_gamma                       90
_cell_volume                            363.3(2)
_cell_formula_units_Z                   2
_cell_measurement_temperature           293.0(2)
_cell_measurement_wavelength            0.71073
 
#----------------------------------------------------------------------------#
#                   CRYSTAL INFORMATION                                      #
#----------------------------------------------------------------------------#
 
_exptl_crystal_description              block
_exptl_crystal_colour                   colorless
_exptl_crystal_size_max                 0.40
_exptl_crystal_size_mid                 0.30
_exptl_crystal_size_min                 0.20
_exptl_crystal_density_diffrn           7.10
_exptl_crystal_density_method           'not measured'
_exptl_crystal_F_000                    656

#----------------------------------------------------------------------------#
#                   ABSORPTION CORRECTION                                    #
#----------------------------------------------------------------------------#
 
_exptl_absorpt_coefficient_mu           40.906
_exptl_absorpt_correction_type          psi-scans

#----------------------------------------------------------------------------#
#                   DATA COLLECTION                                          #
#----------------------------------------------------------------------------#
 
_diffrn_ambient_temperature             293.0(2)
_diffrn_radiation_wavelength            0.71073
_diffrn_radiation_type                  MoK\a
_diffrn_radiation_monochromator         graphite
_diffrn_radiation_probe                 x-ray
_diffrn_reflns_number                   1293
_diffrn_reflns_av_R_equivalents         0
_diffrn_reflns_av_unetI/netI            0.0413
_diffrn_reflns_limit_h_min              -7
_diffrn_reflns_limit_h_max              7
_diffrn_reflns_limit_k_min              -9
_diffrn_reflns_limit_k_max              5
_diffrn_reflns_limit_l_min              0
_diffrn_reflns_limit_l_max              11
_diffrn_reflns_theta_min                2.29
_diffrn_reflns_theta_max                27.94
_diffrn_reflns_theta_full               27.94
_diffrn_measured_fraction_theta_full
                                        0.945
_diffrn_measured_fraction_theta_max
                                        0.945
_reflns_number_total                    1293
_reflns_number_gt                       1291
_reflns_threshold_expression            >2sigma(I)
 
#----------------------------------------------------------------------------#
#                   COMPUTER PROGRAMS USED                                   #
#----------------------------------------------------------------------------#
 
_computing_structure_refinement         'SHELXL-97 (Sheldrick, 1997)'
_computing_molecular_graphics           'Ortep-3 for Windows (Farrugia, 1997)'
_computing_publication_material
                                   'WinGX publication routines (Farrugia, 1999)'
 
#----------------------------------------------------------------------------#
#                   REFINEMENT INFORMATION                                   #
#----------------------------------------------------------------------------#
 
_refine_special_details
;
 Refinement of F^2^ against ALL reflections.  The weighted R-factor wR and
 goodness of fit S are based on F^2^, conventional R-factors R are based
 on F, with F set to zero for negative F^2^. The threshold expression of
 F^2^ > 2sigma(F^2^) is used only for calculating R-factors(gt) etc. and is
 not relevant to the choice of reflections for refinement.  R-factors based
 on F^2^ are statistically about twice as large as those based on F, and R-
 factors based on ALL data will be even larger.
;
_refine_ls_structure_factor_coef        Fsqd
_refine_ls_matrix_type                  full
_refine_ls_weighting_scheme             calc
_refine_ls_weighting_details
        'calc w=1/[\s^2^(Fo^2^)+(0.1273P)^2^+11.7570P] where P=(Fo^2^+2Fc^2^)/3'
_atom_sites_solution_primary            direct
_atom_sites_solution_secondary          difmap
_atom_sites_solution_hydrogens          geom
_refine_ls_hydrogen_treatment           mixed
_refine_ls_extinction_method            SHELXL
_refine_ls_extinction_expression
                                    Fc^*^=kFc[1+0.001xFc^2^\l^3^/sin(2\q)]^-1/4^
_refine_ls_extinction_coef              0.0031(10)
_refine_ls_number_reflns                1293
_refine_ls_number_parameters            74
_refine_ls_number_restraints            1
_refine_ls_R_factor_all                 0.0601
_refine_ls_R_factor_gt                  0.0600
_refine_ls_wR_factor_ref                0.1591
_refine_ls_wR_factor_gt                 0.1589
_refine_ls_goodness_of_fit_ref          1.082
_refine_ls_restrained_S_all             1.082
_refine_ls_shift/su_max                 0.000
_refine_ls_shift/su_mean                0.000
_refine_ls_abs_structure_details
                                    'Flack H D (1983), Acta Cryst. A39, 876-881'
_refine_ls_abs_structure_Flack          0.02(3)
_refine_diff_density_max                6.052
_refine_diff_density_min                -6.107
_refine_diff_density_rms                1.048
 
#----------------------------------------------------------------------------#
#                   ATOMIC TYPES, COORDINATES AND THERMAL PARAMETERS         #
#----------------------------------------------------------------------------#
 
loop_
    _atom_type_symbol
    _atom_type_description
    _atom_type_scat_dispersion_real
    _atom_type_scat_dispersion_imag
    _atom_type_scat_source
O O 0.0106 0.006 'International Tables Vol C Tables 4.2.6.8 and 6.1.1.4'
Te Te -0.5308 1.6751 'International Tables Vol C Tables 4.2.6.8 and 6.1.1.4'
Ba Ba -0.3244 2.2819 'International Tables Vol C Tables 4.2.6.8 and 6.1.1.4'
W W -0.849 6.8722 'International Tables Vol C Tables 4.2.6.8 and 6.1.1.4'
 
loop_
    _atom_site_label
    _atom_site_type_symbol
    _atom_site_fract_x
    _atom_site_fract_y
    _atom_site_fract_z
    _atom_site_U_iso_or_equiv
    _atom_site_adp_type
    _atom_site_occupancy
    _atom_site_symmetry_multiplicity
    _atom_site_calc_flag
    _atom_site_refinement_flags
    _atom_site_disorder_assembly
    _atom_site_disorder_group
Ba1 Ba 0.7314(3) -0.3984(3) -0.56309(17) 0.0182(5) Uani 1 1 d . . .
W1 W 0.77941(17) 0.12354(16) 0.26335(10) 0.0126(3) Uani 1 1 d . . .
W2 W 1.22089(18) -0.19968(17) 0.17548(10) 0.0122(4) Uani 1 1 d . . .
Te1 Te 0.6250(3) -0.1401(3) -0.08657(18) 0.0125(4) Uani 1 1 d . . .
O1 O 0.546(4) -0.053(3) 0.123(2) 0.016(4) Uiso 1 1 d . . .
O2 O 1.036(3) 0.005(3) 0.1418(19) 0.014(4) Uiso 1 1 d . . .
O3 O 0.984(4) 0.289(4) 0.331(2) 0.020(4) Uiso 1 1 d . . .
O4 O 0.297(3) -0.217(3) -0.0572(18) 0.012(3) Uiso 1 1 d . . .
O5 O 0.485(3) 0.250(3) 0.3008(19) 0.013(4) Uiso 1 1 d . . .
O6 O 0.770(4) -0.023(4) 0.415(2) 0.018(4) Uiso 1 1 d . . .
O7 O 1.460(4) -0.418(3) 0.171(2) 0.019(4) Uiso 1 1 d . . .
O8 O 0.983(4) -0.351(4) 0.166(2) 0.022(4) Uiso 1 1 d . . .
O9 O 1.278(3) -0.176(3) 0.3665(19) 0.013(4) Uiso 1 1 d . . .
 
loop_
    _atom_site_aniso_label
    _atom_site_aniso_U_11
    _atom_site_aniso_U_22
    _atom_site_aniso_U_33
    _atom_site_aniso_U_23
    _atom_site_aniso_U_13
    _atom_site_aniso_U_12
Ba1 0.0227(8) 0.0161(10) 0.0158(7) 0.0009(6) -0.0009(5) 0.0006(7)
W1 0.0132(5) 0.0104(6) 0.0143(5) 0.0003(4) -0.0009(3) 0.0006(4)
W2 0.0135(5) 0.0102(6) 0.0130(5) -0.0008(4) -0.0001(3) 0.0007(4)
Te1 0.0112(8) 0.0110(9) 0.0153(7) 0.0013(6) 0.0004(5) -0.0002(6)
 
 
#----------------------------------------------------------------------------#
#                   MOLECULAR GEOMETRY                                       #
#----------------------------------------------------------------------------#
 
_geom_special_details
;
 All esds (except the esd in the dihedral angle between two l.s. planes)
 are estimated using the full covariance matrix.  The cell esds are taken
 into account individually in the estimation of esds in distances, angles
 and torsion angles; correlations between esds in cell parameters are only
 used when they are defined by crystal symmetry.  An approximate (isotropic)
 treatment of cell esds is used for estimating esds involving l.s. planes.
;
loop_
    _geom_bond_atom_site_label_1
    _geom_bond_atom_site_label_2
    _geom_bond_distance
    _geom_bond_site_symmetry_2
    _geom_bond_publ_flag
Ba1 O9 2.71(2) 2_745 ?
Ba1 O7 2.792(19) 1_454 ?
Ba1 O8 2.80(2) 1_554 ?
Ba1 O6 2.81(3) 1_554 ?
Ba1 O5 2.847(19) 2_645 ?
Ba1 O3 2.87(3) 1_544 ?
Ba1 O3 2.93(2) 2_745 ?
Ba1 O9 3.049(19) 1_454 ?
Ba1 O6 3.17(2) 2_745 ?
Ba1 O5 3.18(2) 1_544 ?
Ba1 O6 3.20(2) 2_645 ?
Ba1 W1 3.774(2) 2_745 ?
W1 O6 1.73(2) . ?
W1 O3 1.77(2) . ?
W1 O5 1.90(2) . ?
W1 O2 1.99(2) . ?
W1 O1 2.22(2) . ?
W1 O4 2.220(19) 2_655 ?
W1 Te1 3.232(2) 2_655 ?
W1 Ba1 3.774(2) 2_755 ?
W1 Ba1 3.884(2) 2_655 ?
W1 Ba1 3.889(3) 1_566 ?
W2 O8 1.73(2) . ?
W2 O9 1.734(17) . ?
W2 O2 1.85(2) . ?
W2 O7 2.09(2) . ?
W2 O4 2.117(17) 1_655 ?
W2 O1 2.14(2) 1_655 ?
W2 Ba1 3.859(2) 1_556 ?
W2 Ba1 3.919(2) 1_656 ?
Te1 O7 1.87(2) 2_755 ?
Te1 O4 1.908(19) . ?
Te1 O1 2.024(19) . ?
Te1 O5 2.156(18) 2_645 ?
Te1 W1 3.232(2) 2_645 ?
O1 W2 2.14(2) 1_455 ?
O3 Ba1 2.87(3) 1_566 ?
O3 Ba1 2.93(2) 2_755 ?
O4 W2 2.117(17) 1_455 ?
O4 W1 2.220(19) 2_645 ?
O5 Te1 2.156(18) 2_655 ?
O5 Ba1 2.847(19) 2_655 ?
O5 Ba1 3.18(2) 1_566 ?
O6 Ba1 2.81(3) 1_556 ?
O6 Ba1 3.17(2) 2_755 ?
O6 Ba1 3.20(2) 2_655 ?
O7 Te1 1.87(2) 2_745 ?
O7 Ba1 2.792(19) 1_656 ?
O8 Ba1 2.80(2) 1_556 ?
O9 Ba1 2.71(2) 2_755 ?
O9 Ba1 3.049(19) 1_656 ?
 
loop_
    _geom_angle_atom_site_label_1
    _geom_angle_atom_site_label_2
    _geom_angle_atom_site_label_3
    _geom_angle
    _geom_angle_site_symmetry_1
    _geom_angle_site_symmetry_3
    _geom_angle_publ_flag
O9 Ba1 O7 119.5(6) 2_745 1_454 ?
O9 Ba1 O8 131.4(7) 2_745 1_554 ?
O7 Ba1 O8 62.8(6) 1_454 1_554 ?
O9 Ba1 O6 143.8(6) 2_745 1_554 ?
O7 Ba1 O6 91.9(6) 1_454 1_554 ?
O8 Ba1 O6 77.1(7) 1_554 1_554 ?
O9 Ba1 O5 76.0(6) 2_745 2_645 ?
O7 Ba1 O5 119.3(6) 1_454 2_645 ?
O8 Ba1 O5 149.9(7) 1_554 2_645 ?
O6 Ba1 O5 72.8(6) 1_554 2_645 ?
O9 Ba1 O3 66.7(6) 2_745 1_544 ?
O7 Ba1 O3 86.3(6) 1_454 1_544 ?
O8 Ba1 O3 65.1(7) 1_554 1_544 ?
O6 Ba1 O3 138.3(6) 1_554 1_544 ?
O5 Ba1 O3 142.0(6) 2_645 1_544 ?
O9 Ba1 O3 85.5(6) 2_745 2_745 ?
O7 Ba1 O3 154.3(7) 1_454 2_745 ?
O8 Ba1 O3 106.3(6) 1_554 2_745 ?
O6 Ba1 O3 62.4(7) 1_554 2_745 ?
O5 Ba1 O3 57.5(6) 2_645 2_745 ?
O3 Ba1 O3 111.1(4) 1_544 2_745 ?
O9 Ba1 O9 121.8(3) 2_745 1_454 ?
O7 Ba1 O9 54.9(6) 1_454 1_454 ?
O8 Ba1 O9 99.3(6) 1_554 1_454 ?
O6 Ba1 O9 60.5(6) 1_554 1_454 ?
O5 Ba1 O9 67.2(5) 2_645 1_454 ?
O3 Ba1 O9 140.2(5) 1_544 1_454 ?
O3 Ba1 O9 108.4(6) 2_745 1_454 ?
O9 Ba1 O6 61.9(6) 2_745 2_745 ?
O7 Ba1 O6 142.4(6) 1_454 2_745 ?
O8 Ba1 O6 88.0(5) 1_554 2_745 ?
O6 Ba1 O6 104.7(5) 1_554 2_745 ?
O5 Ba1 O6 97.9(5) 2_645 2_745 ?
O3 Ba1 O6 58.8(6) 1_544 2_745 ?
O3 Ba1 O6 52.5(7) 2_745 2_745 ?
O9 Ba1 O6 160.9(6) 1_454 2_745 ?
O9 Ba1 O5 66.8(5) 2_745 1_544 ?
O7 Ba1 O5 53.9(6) 1_454 1_544 ?
O8 Ba1 O5 89.2(6) 1_554 1_544 ?
O6 Ba1 O5 145.5(5) 1_554 1_544 ?
O5 Ba1 O5 116.9(4) 2_645 1_544 ?
O3 Ba1 O5 54.0(6) 1_544 1_544 ?
O3 Ba1 O5 151.8(6) 2_745 1_544 ?
O9 Ba1 O5 91.4(5) 1_454 1_544 ?
O6 Ba1 O5 106.4(6) 2_745 1_544 ?
O9 Ba1 O6 59.5(6) 2_745 2_645 ?
O7 Ba1 O6 82.9(5) 1_454 2_645 ?
O8 Ba1 O6 145.1(5) 1_554 2_645 ?
O6 Ba1 O6 112.5(6) 1_554 2_645 ?
O5 Ba1 O6 53.7(6) 2_645 2_645 ?
O3 Ba1 O6 108.6(7) 1_544 2_645 ?
O3 Ba1 O6 107.7(5) 2_745 2_645 ?
O9 Ba1 O6 62.5(5) 1_454 2_645 ?
O6 Ba1 O6 119.2(7) 2_745 2_645 ?
O5 Ba1 O6 63.5(5) 1_544 2_645 ?
O9 Ba1 W1 66.1(4) 2_745 2_745 ?
O7 Ba1 W1 166.9(4) 1_454 2_745 ?
O8 Ba1 W1 104.4(4) 1_554 2_745 ?
O6 Ba1 W1 87.3(4) 1_554 2_745 ?
O5 Ba1 W1 72.8(4) 2_645 2_745 ?
O3 Ba1 W1 85.6(4) 1_544 2_745 ?
O3 Ba1 W1 27.0(5) 2_745 2_745 ?
O9 Ba1 W1 134.2(4) 1_454 2_745 ?
O6 Ba1 W1 27.1(4) 2_745 2_745 ?
O5 Ba1 W1 127.0(3) 1_544 2_745 ?
O6 Ba1 W1 109.4(3) 2_645 2_745 ?
O6 W1 O3 101.3(10) . . ?
O6 W1 O5 98.4(9) . . ?
O3 W1 O5 97.7(9) . . ?
O6 W1 O2 99.6(10) . . ?
O3 W1 O2 92.4(9) . . ?
O5 W1 O2 157.2(7) . . ?
O6 W1 O1 92.4(9) . . ?
O3 W1 O1 165.6(9) . . ?
O5 W1 O1 84.5(8) . . ?
O2 W1 O1 80.9(8) . . ?
O6 W1 O4 166.0(8) . 2_655 ?
O3 W1 O4 91.5(9) . 2_655 ?
O5 W1 O4 73.9(7) . 2_655 ?
O2 W1 O4 85.4(8) . 2_655 ?
O1 W1 O4 75.4(8) . 2_655 ?
O6 W1 Te1 134.1(7) . 2_655 ?
O3 W1 Te1 102.7(8) . 2_655 ?
O5 W1 Te1 40.0(5) . 2_655 ?
O2 W1 Te1 117.7(5) . 2_655 ?
O1 W1 Te1 70.0(6) . 2_655 ?
O4 W1 Te1 35.1(5) 2_655 2_655 ?
O6 W1 Ba1 56.6(7) . 2_755 ?
O3 W1 Ba1 48.9(8) . 2_755 ?
O5 W1 Ba1 119.9(5) . 2_755 ?
O2 W1 Ba1 81.9(5) . 2_755 ?
O1 W1 Ba1 141.0(6) . 2_755 ?
O4 W1 Ba1 137.4(5) 2_655 2_755 ?
Te1 W1 Ba1 148.22(6) 2_655 2_755 ?
O6 W1 Ba1 54.2(7) . 2_655 ?
O3 W1 Ba1 104.8(7) . 2_655 ?
O5 W1 Ba1 44.2(6) . 2_655 ?
O2 W1 Ba1 150.6(6) . 2_655 ?
O1 W1 Ba1 86.7(5) . 2_655 ?
O4 W1 Ba1 117.0(5) 2_655 2_655 ?
Te1 W1 Ba1 81.92(5) 2_655 2_655 ?
Ba1 W1 Ba1 91.59(5) 2_755 2_655 ?
O6 W1 Ba1 105.4(8) . 1_566 ?
O3 W1 Ba1 43.4(8) . 1_566 ?
O5 W1 Ba1 54.3(6) . 1_566 ?
O2 W1 Ba1 132.2(6) . 1_566 ?
O1 W1 Ba1 136.6(6) . 1_566 ?
O4 W1 Ba1 80.0(6) 2_655 1_566 ?
Te1 W1 Ba1 69.29(5) 2_655 1_566 ?
Ba1 W1 Ba1 79.01(4) 2_755 1_566 ?
Ba1 W1 Ba1 73.47(3) 2_655 1_566 ?
O8 W2 O9 104.2(9) . . ?
O8 W2 O2 96.8(11) . . ?
O9 W2 O2 99.8(9) . . ?
O8 W2 O7 87.9(10) . . ?
O9 W2 O7 89.3(9) . . ?
O2 W2 O7 168.3(7) . . ?
O8 W2 O4 93.9(9) . 1_655 ?
O9 W2 O4 157.9(8) . 1_655 ?
O2 W2 O4 90.3(8) . 1_655 ?
O7 W2 O4 78.7(8) . 1_655 ?
O8 W2 O1 162.1(8) . 1_655 ?
O9 W2 O1 90.8(8) . 1_655 ?
O2 W2 O1 90.1(9) . 1_655 ?
O7 W2 O1 82.5(9) . 1_655 ?
O4 W2 O1 69.5(7) 1_655 1_655 ?
O8 W2 Ba1 41.3(7) . 1_556 ?
O9 W2 Ba1 64.7(6) . 1_556 ?
O2 W2 Ba1 91.7(6) . 1_556 ?
O7 W2 Ba1 98.7(6) . 1_556 ?
O4 W2 Ba1 135.0(6) 1_655 1_556 ?
O1 W2 Ba1 155.3(5) 1_655 1_556 ?
O8 W2 Ba1 108.6(8) . 1_656 ?
O9 W2 Ba1 48.1(6) . 1_656 ?
O2 W2 Ba1 142.6(6) . 1_656 ?
O7 W2 Ba1 43.3(5) . 1_656 ?
O4 W2 Ba1 114.2(5) 1_655 1_656 ?
O1 W2 Ba1 74.2(6) 1_655 1_656 ?
Ba1 W2 Ba1 89.80(5) 1_556 1_656 ?
O7 Te1 O4 95.1(9) 2_755 . ?
O7 Te1 O1 91.9(9) 2_755 . ?
O4 Te1 O1 76.2(8) . . ?
O7 Te1 O5 85.0(9) 2_755 2_645 ?
O4 Te1 O5 75.3(7) . 2_645 ?
O1 Te1 O5 151.0(8) . 2_645 ?
O7 Te1 W1 96.8(6) 2_755 2_645 ?
O4 Te1 W1 42.1(5) . 2_645 ?
O1 Te1 W1 118.1(6) . 2_645 ?
O5 Te1 W1 34.5(5) 2_645 2_645 ?
Te1 O1 W2 102.8(9) . 1_455 ?
Te1 O1 W1 125.5(10) . . ?
W2 O1 W1 131.3(9) 1_455 . ?
W2 O2 W1 131.8(10) . . ?
W1 O3 Ba1 111.6(9) . 1_566 ?
W1 O3 Ba1 104.1(11) . 2_755 ?
Ba1 O3 Ba1 114.3(7) 1_566 2_755 ?
Te1 O4 W2 107.9(8) . 1_455 ?
Te1 O4 W1 102.8(8) . 2_645 ?
W2 O4 W1 143.3(11) 1_455 2_645 ?
W1 O5 Te1 105.5(8) . 2_655 ?
W1 O5 Ba1 108.1(8) . 2_655 ?
Te1 O5 Ba1 138.9(8) 2_655 2_655 ?
W1 O5 Ba1 96.6(7) . 1_566 ?
Te1 O5 Ba1 98.0(8) 2_655 1_566 ?
Ba1 O5 Ba1 100.8(5) 2_655 1_566 ?
W1 O6 Ba1 133.1(10) . 1_556 ?
W1 O6 Ba1 96.3(9) . 2_755 ?
Ba1 O6 Ba1 109.0(7) 1_556 2_755 ?
W1 O6 Ba1 99.7(9) . 2_655 ?
Ba1 O6 Ba1 101.1(6) 1_556 2_655 ?
Ba1 O6 Ba1 119.2(7) 2_755 2_655 ?
Te1 O7 W2 122.8(10) 2_745 . ?
Te1 O7 Ba1 121.1(10) 2_745 1_656 ?
W2 O7 Ba1 105.9(8) . 1_656 ?
W2 O8 Ba1 114.7(10) . 1_556 ?
W2 O9 Ba1 134.8(11) . 2_755 ?
W2 O9 Ba1 106.8(8) . 1_656 ?
Ba1 O9 Ba1 107.6(6) 2_755 1_656 ?
 


1
